# Supplementary material
Source: bioRxiv or medRxiv preprint supplement (https://medrxiv.org/highwire/filestream/88878/field_highwire_adjunct_files/0/2020.07.08.20148718-1.pdf)
Supplement: Supplementary file [file 2020.07.08.20148718-1.pdf]

## Supplementary Information

### **High levels of SARS-CoV-2 specific T-cells with restricted functionality in patients with severe course of COVID-19**

David Schub<sup>1</sup>, Verena Klemis<sup>1</sup>, Sophie Schneitler<sup>2</sup>, Janine Mihm<sup>3</sup>, Philipp M. Lepper<sup>4</sup>, Heinrike Wilkens<sup>4</sup>, Robert Bals<sup>4</sup>, Hermann Eichler<sup>5</sup>, Barbara C. Gärtner<sup>2</sup>, Sören L. Becker<sup>2</sup>, Urban Sester<sup>3</sup>, Martina Sester<sup>1,\*</sup>, and Tina Schmidt<sup>1</sup>

<sup>1</sup>Department of Transplant and Infection Immunology, <sup>2</sup>Institute of Medical Microbiology and Hygiene, <sup>3</sup>Department of Internal Medicine IV, <sup>4</sup>Department of Internal Medicine V, <sup>5</sup>Institute of Clinical Hemostaseology and Transfusion Medicine, Saarland University, 66421 Homburg, Germany

\*Correspondence: [martina.sester@uks.eu](mailto:martina.sester@uks.eu)

## Supplementary figures

### Supplementary figure S1

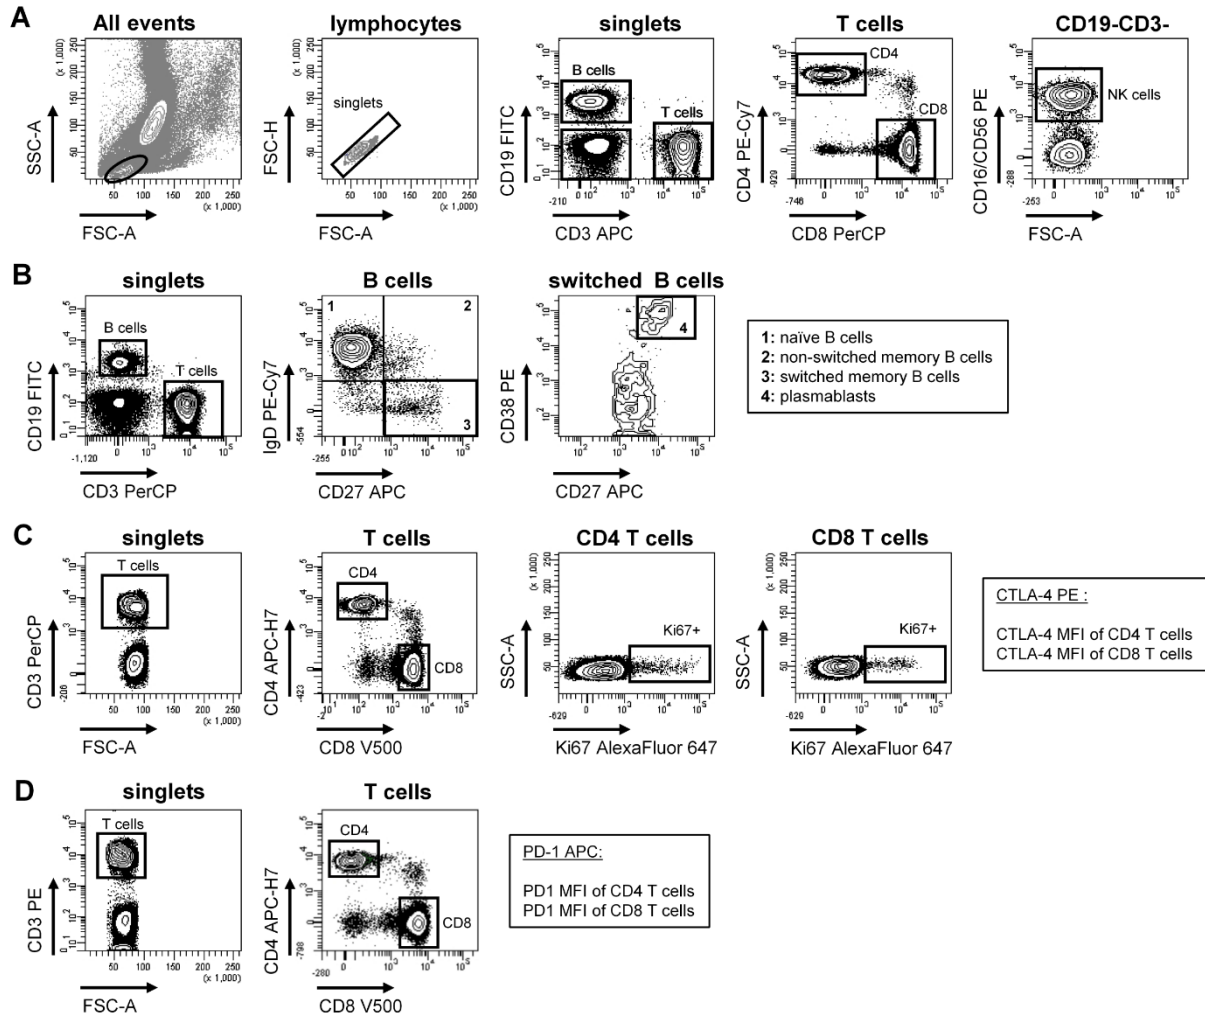

### Supplementary figure S1: Gating strategies for quantitation of lymphocyte populations. (A)

To quantify lymphocyte subpopulations, lymphocytes were gated within all events according to SSC-A and FSC-A. Exclusion of doublets was performed using high and area signal of FSC. Among single lymphocytes, B cells and T cells were identified according to expression of CD19 and CD3. T cells were further subdivided into helper T cells (CD4) and cytotoxic T cells (CD8). NK cells were determined by CD16 and/or CD56 expressing cells among single lymphocytes neither expressing CD19 nor CD3. **(B)** Among single lymphocytes, B cells were identified as CD19+CD3- and T cells were gated according to expression of CD19 and CD3. According to IgD-

and CD27-expression, B cells were subdivided in naïve (IgD+CD27-), non-switched memory (IgD+CD27+) or switched memory B cells (IgD-CD27+). Plasmablasts were identified among switched memory B cells by additional staining of CD38. As plasmablasts may also be extended in size and granularity compared with non-plasmablast, lymphocyte gates (FSC and SSC) were enlarged for quantitation of these cells. **(C)** CD3+ T cells were identified among single lymphocytes and further subdivided in CD4 and CD8 T cells. Both subpopulations were analyzed towards expression of Ki67 (percentage of positive cells) and CTLA-4 (MFI of CD4 or CD8 T cells). **(D)** CD4 and CD8 T cells were identified among total T cells (CD3) and analyzed towards expression of PD-1 (PD1 MFI). CTLA-4, cytotoxic T lymphocyte antigen 4; FSC, forward scatter; PD-1, programmed cell death 1; SSC, side scatter.

Supplementary figure S2

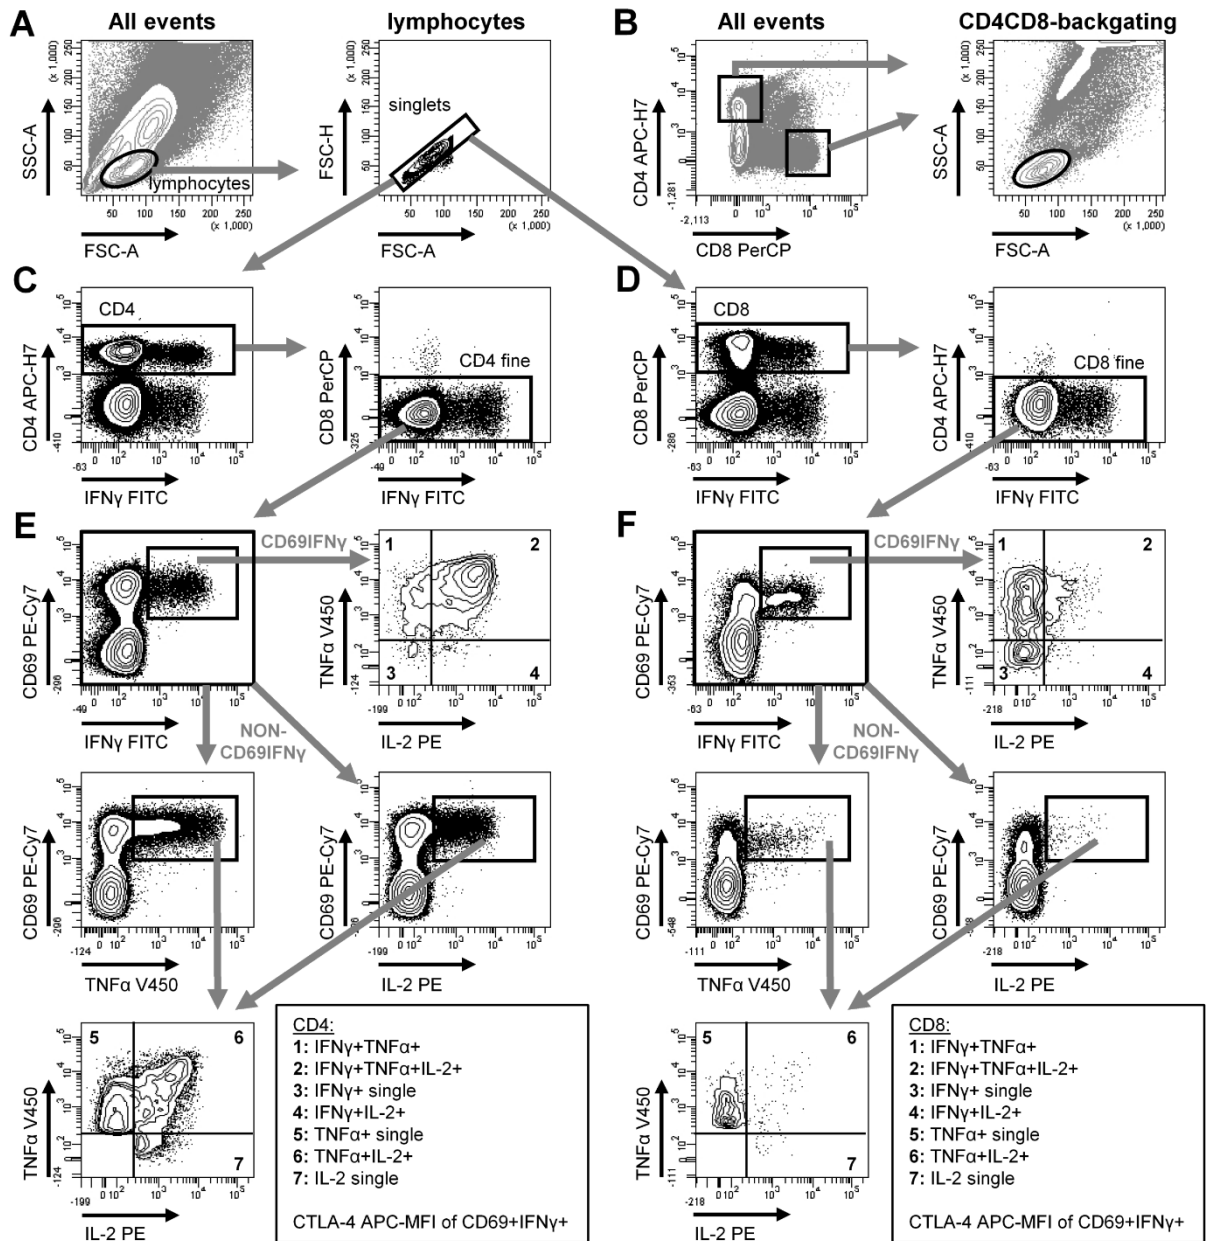

Supplementary figure S2: Gating strategy for analysis of cytokine and CTLA-4 expression of antigen-specific T cells. (A) Lymphocytes were gated among total events according to size (FSC) and granularity (SSC) followed by exclusion of doublets using high and area signal of FSC. (B) To ensure accurate gating of lymphocytes, CD4/CD8 backgating was used which allows for an highlighted visualization of this population. (C) Among single lymphocytes, CD4 T cells

(fine) were identified by exclusion of CD4-negative and CD8-positive cells. **(D)** Similarly, CD8 T cells (fine) were identified among single lymphocytes by exclusion of CD8-negative and CD4-positive cells. To determine the percentage of antigen-specific cells, CD69+IFN $\gamma$ + T cells were identified among CD4 **(E)** and CD8 T cells **(F)**. CD69+IFN $\gamma$ + CD4 or CD8 T cells were subdivided according to expression of TNF $\alpha$  and IL-2. Among CD4 or CD8 T cells not coexpressing CD69 and IFN $\gamma$ , „AND/OR-gating“ of CD69+TNF $\alpha$ + and CD69+IL2+ CD4 or CD8 T cells allowed for identification of cells with single or combined expression of TNF $\alpha$  and IL-2. In addition expression of CTLA-4 (MFI) of CD69+IFN $\gamma$ + CD4 and CD8 T cells was analyzed. IFN, interferon; IL, interleukin; TNF, tumor necrosis factor.

Supplementary figure S3

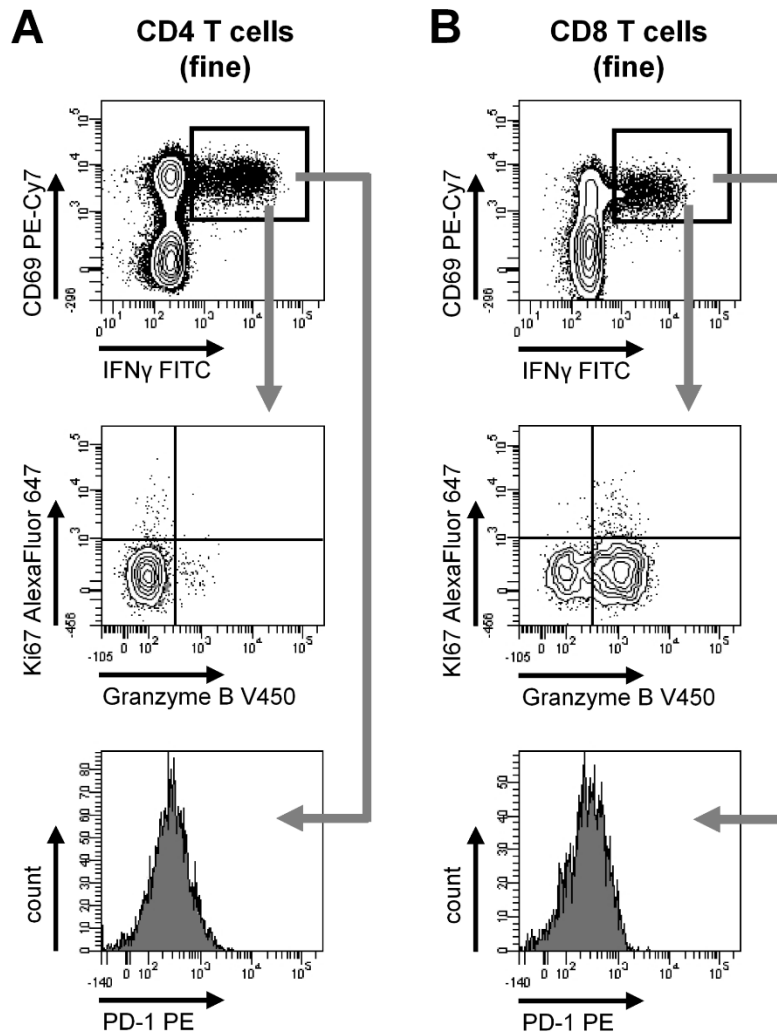

**Supplementary Figure S3: Gating strategy for analysis of Ki67-, Granzyme B- and PD-1-expression of antigen-specific T cells.** Among CD4 (A) and CD8 T cells (B) (fine gating s. supplementary figure S2), antigen-specific cells were identified by co-expression of CD69 and IFN $\gamma$ . These cells were analyzed towards their expression of Ki67 and/or Granzyme B (percentage of positive cells) as well as expression of PD-1 (MFI). IFN, interferon; PD-1, programmed cell death 1.

## Supplementary Table

Supplementary Table S1: Antibodies for flow cytometric analysis

| Antigen        | conjugate      | clone       | isotype | reactivity       |
|----------------|----------------|-------------|---------|------------------|
| CD3            | APC, PerCP     | SK7         | IgG1 k  | mouse anti-human |
| CD4            | PE-Cy7, APC-H7 | SK3         | IgG1 k  | mouse anti-human |
| CD8            | V500, PerCP    | RPA-T8, SK1 | IgG1 k  | mouse anti-human |
| CD16           | PE             | 3G8         | IgG1 k  | mouse anti-human |
| CD19           | FITC           | HIB19       | IgG1 k  | mouse anti-human |
| CD27           | APC            | L128        | IgG1 k  | mouse anti-human |
| CD38           | PE             | HB7         | IgG1 k  | mouse anti-human |
| CD56           | PE             | B159        | IgG1 k  | mouse anti-human |
| CD69           | PE-Cy7         | L78         | IgG1 k  | mouse anti-human |
| CD152 (CTLA-4) | PE, APC        | BNI3        | IgG2a k | mouse anti-human |
| CD279 (PD-1)   | APC, PE        | MIH4        | IgG1 k  | mouse anti-human |
| Granzyme B     | V450           | GB11        | IgG1 k  | mouse anti-human |
| IFN $\gamma$   | FITC           | 4S.B3       | IgG1 k  | mouse anti-human |
| IgD            | PE-Cy7         | IA6-2       | IgG2a k | mouse anti-human |
| IL-2           | PE             | MQ1-17H12   | IgG2a k | rat anti-human   |
| Ki67           | AlexaFluor 647 | B56         | IgG1 k  | mouse anti-human |
| TNF $\alpha$   | V450           | MAB11       | IgG1 k  | mouse anti-human |

All antibodies were purchased from BD.
